# Supplementary material for: A protected annealing strategy to enhanced light emission and photostability of YAG:Ce nanoparticle-based films
Source: Royal Society of Chemistry journal article supplement (doi:10.1039/c0nr01000f), 2011-01-01
Supplement: c0nr01000f.pdf [file c0nr01000f.pdf]

## A protected annealing strategy to enhanced light emission and photostability of YAG:Ce nanoparticle-based films

Amelie Revaux, Geraldine Dantelle, Nathan George, Ram Seshadri, Thierry Gacoin and Jean-Pierre Boilot.

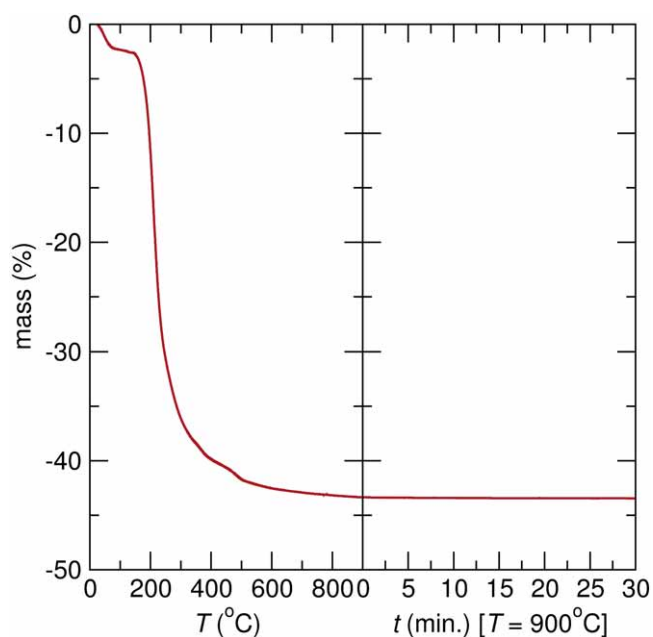

**Figure 1S:** TGA curve of the copolymer-templated mesoporous silica containing YAG:Ce nanoparticles, in air.

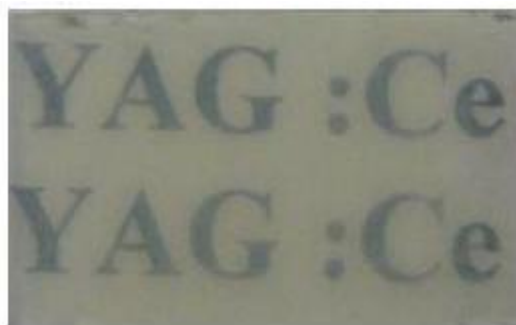

**Figure 2S:** Picture of a 5 micron YAG:Ce film deposited by spray-coating.
